# Supplementary material for: Development of a gold-nanorod-based lateral flow immunoassay for a fast and dual-modal detection of C-reactive protein in clinical plasma samples
Source: Royal Society of Chemistry journal article supplement (doi:10.1039/d1ra04404d), 2021-01-01
Supplement: d1ra04404d1.pdf [file d1ra04404d1.pdf]

## **Development of a gold-nanorod-based lateral flow immunoassay for fast and dual-modal detection of C-reactive protein in clinical plasma samples**

*Renzhu Pang,<sup>a</sup> Qunyan Zhu,<sup>\*b</sup> Jia Wei,<sup>a</sup> Yaoqi Wang,<sup>a</sup> Fengqin Xu,<sup>bc</sup> Xianying Meng<sup>\*a</sup> and Zhenxin Wang<sup>\*bc</sup>*

<sup>a</sup> Department of Thyroid Surgery, The First Hospital of Jilin University, Changchun, 130021, P. R. China. E-mail: [mengxiany@mail.jlu.edu.cn](mailto:mengxiany@mail.jlu.edu.cn)

<sup>b</sup> State key Laboratory of Electroanalytical Chemistry, Changchun Institute of Applied Chemistry, Chinese Academy of Sciences, Changchun, 130022, P. R. China. E-mail: [wangzx@ciac.ac.cn](mailto:wangzx@ciac.ac.cn) and [zhuqy@ciac.ac.cn](mailto:zhuqy@ciac.ac.cn)

<sup>c</sup> School of Applied Chemical Engineering, University of Science and Technology of China, Road Baohe District, Hefei, 230026, P. R. China.

### **Content**

### **Additional Figures**

## Additional Figures

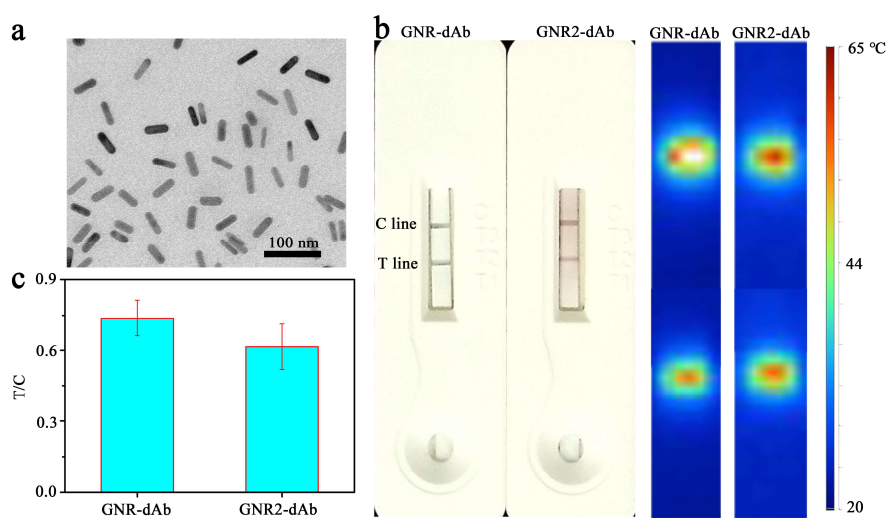

**Fig. S1** (a) The TEM micrograph of GNR2-dAb. (b) Optical and photothermal images of immunochromatographic strips with GNR-dAb and GNR2-dAb as detection probes for detection of CRP under same experimental conditions, and (c) the corresponding T/C values. The concentration of CRP is 1  $\mu\text{g}/\text{mL}$ . The average length of GNR2-dAb is  $46.8 \pm 2.7$  nm and the aspect ratio is  $3.31 \pm 0.35$ .

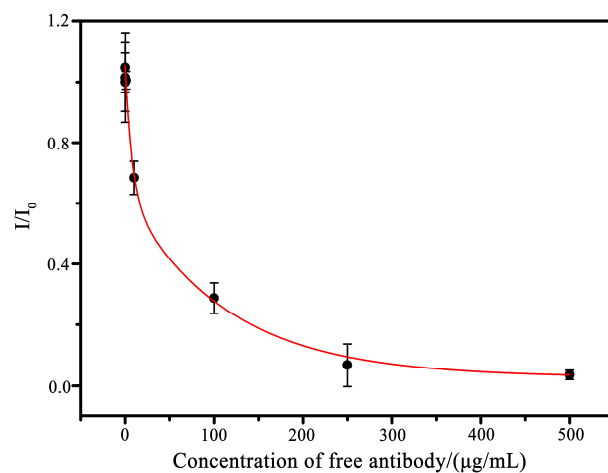

**Fig. S2** The competitive experiment of free detection antibody (dAb) with GNR-dAb on the detection of 1  $\mu\text{g/mL}$  CRP. In this experiment, the free antibodies (dAb) with different concentrations were spiked into GNR-dAb solution, and then added onto the conjugate pad for CRP detection.
